# Supplementary material for: Evidence that Mediator is essential for Pol II transcription, but is not a required component of the preinitiation complex in vivo
Source: eLife journal article supplement (doi:10.7554/elife.28447), 2017-07-12

Figure 1 -- figure supplement 1

A

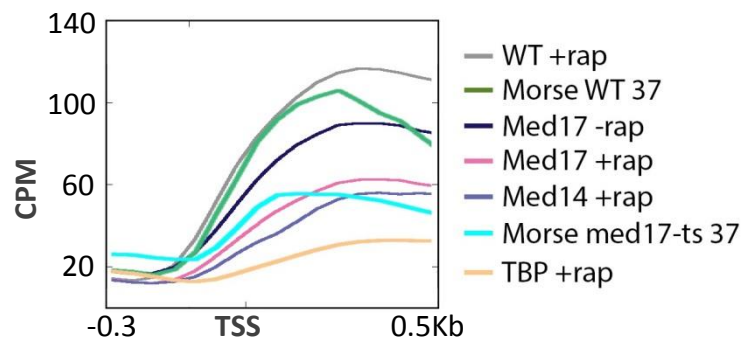

B

Occupancy of different Mediator subunits upon Med17 anchor-away

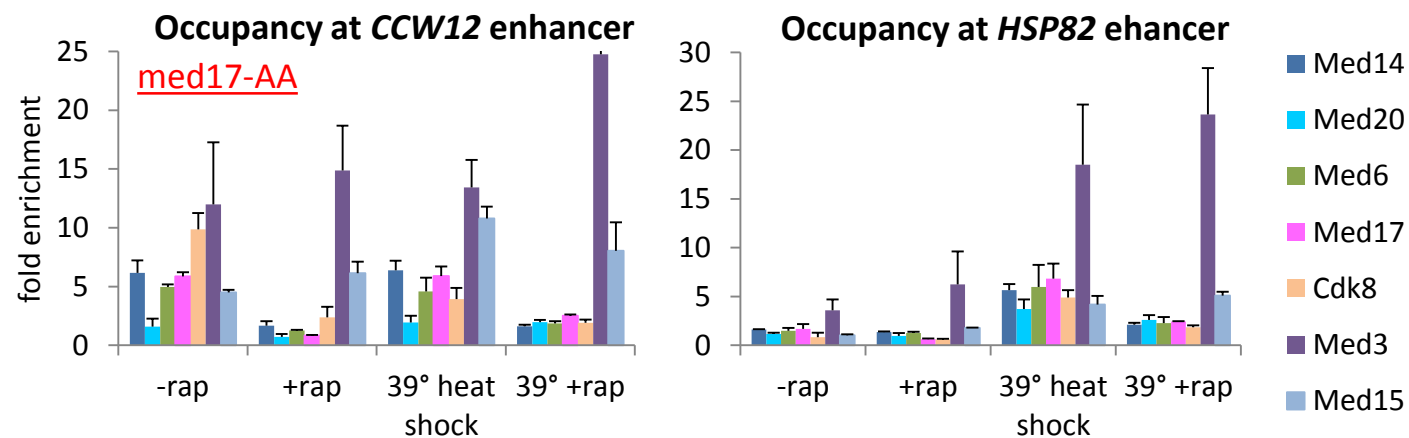

# Figure 1 -- figure supplement 2

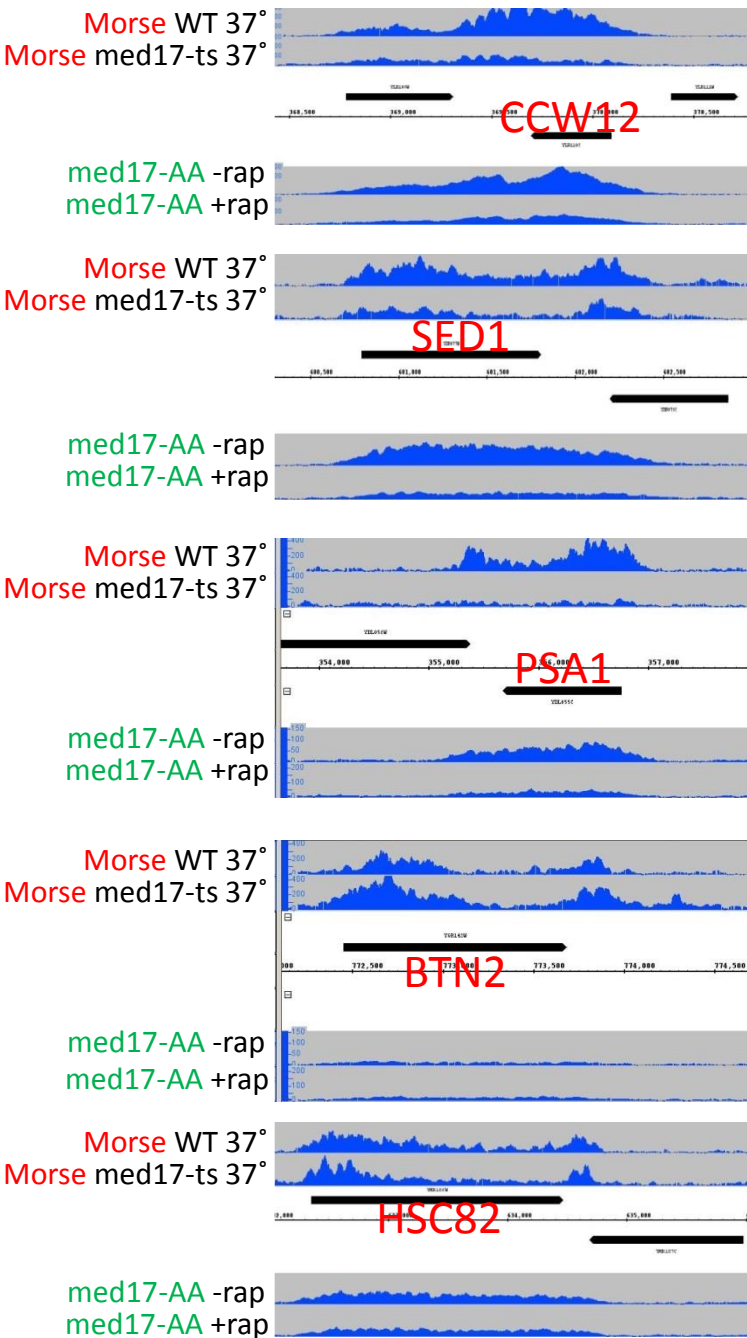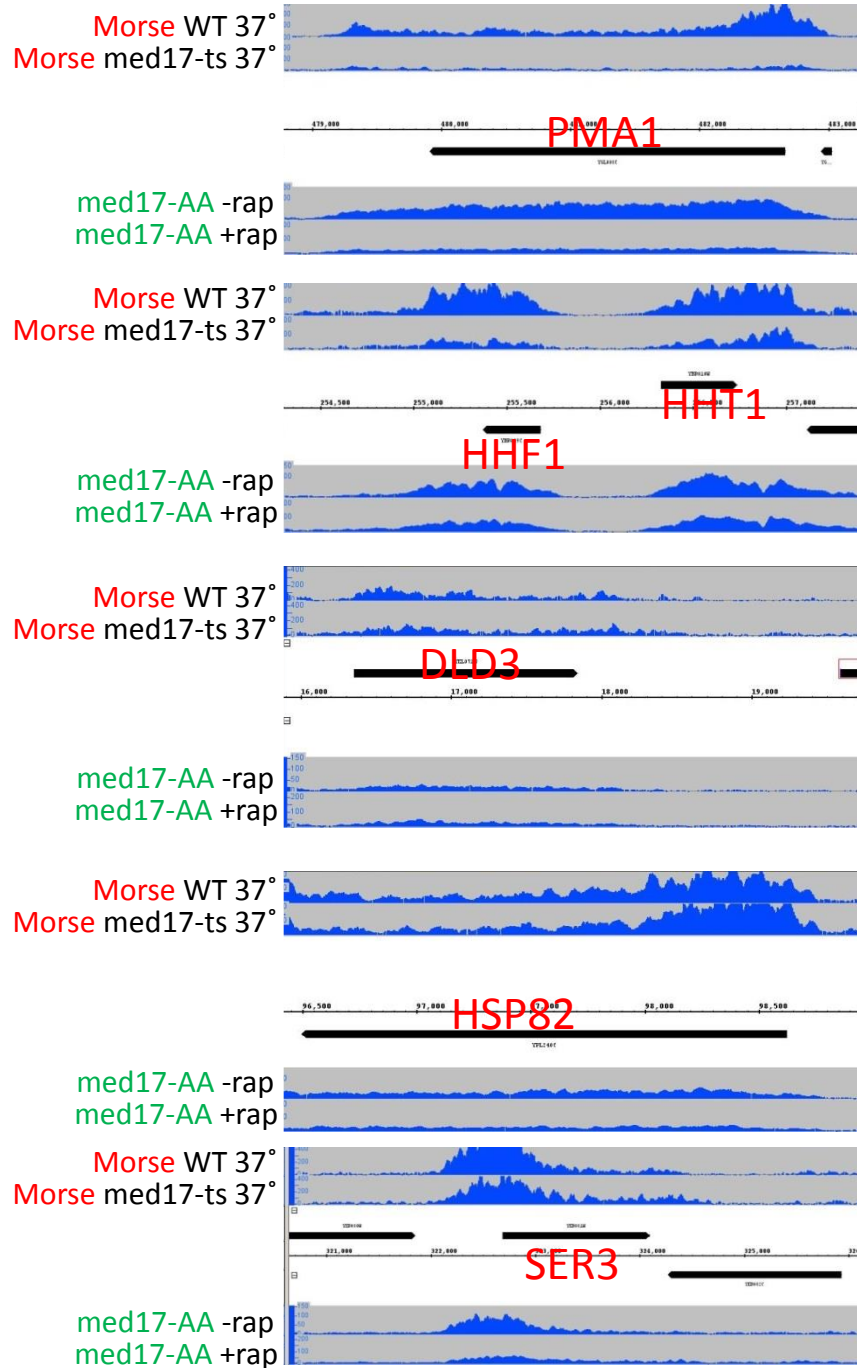

Figure 1 -- figure supplement 3

A

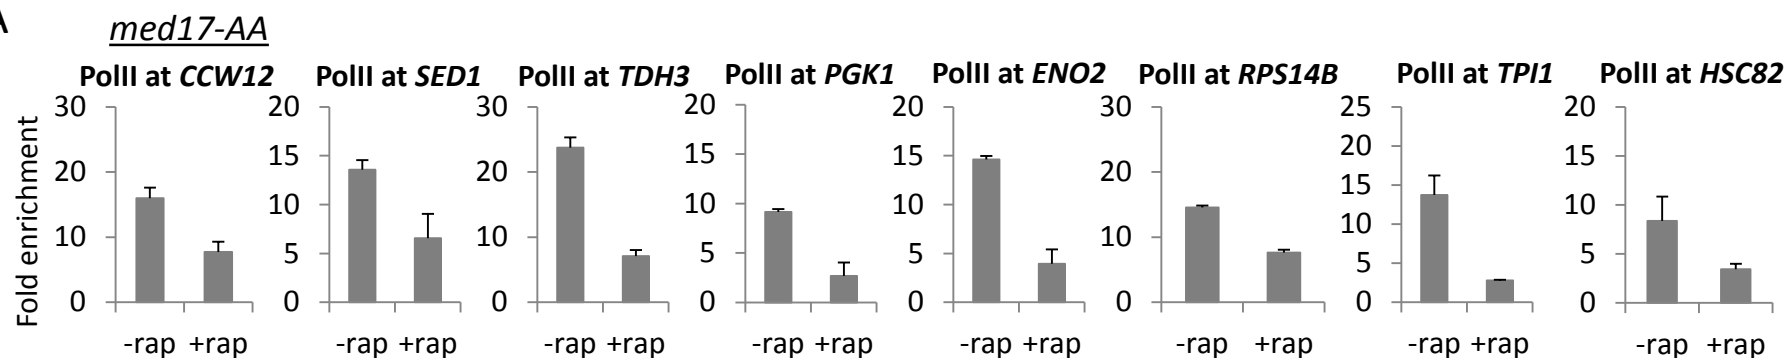

B

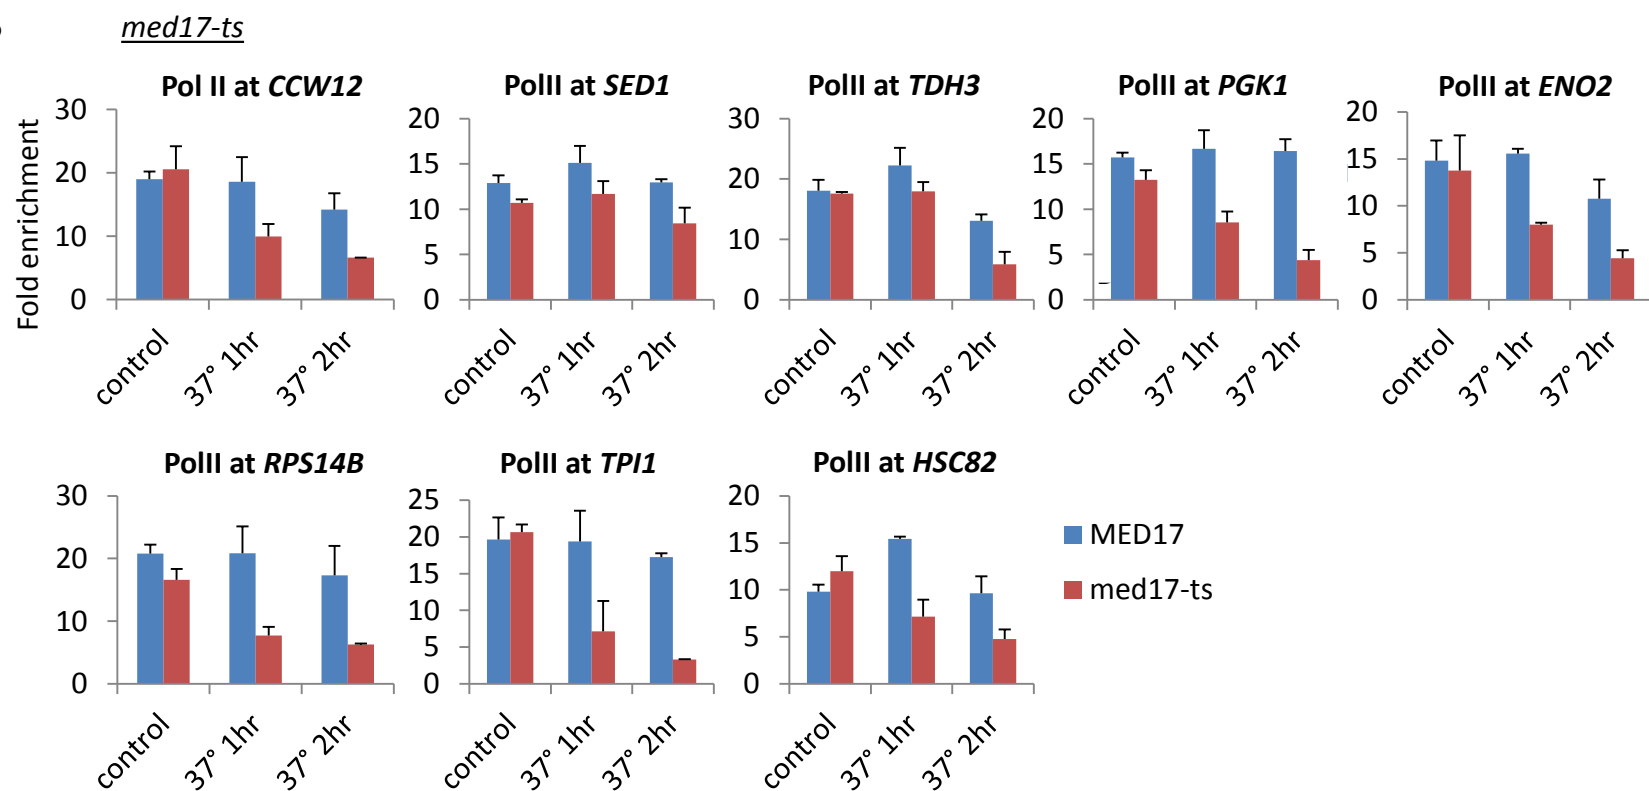

Figure 2 -- figure supplement 1

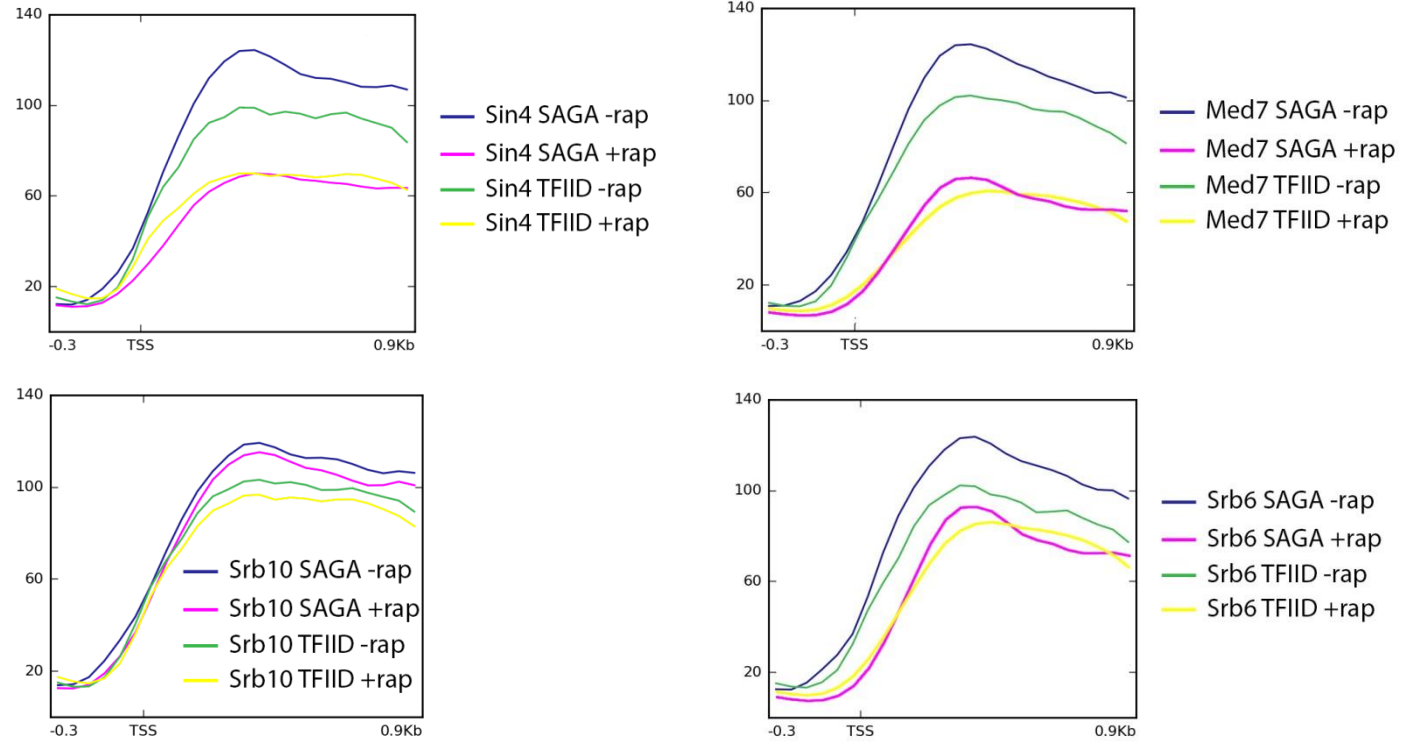

Figure 3 -- figure supplement 1

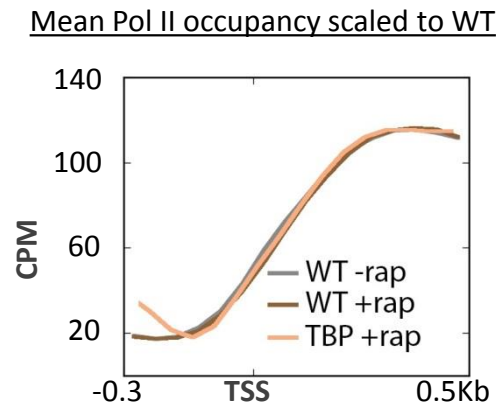

Figure 4 -- figure supplement 1

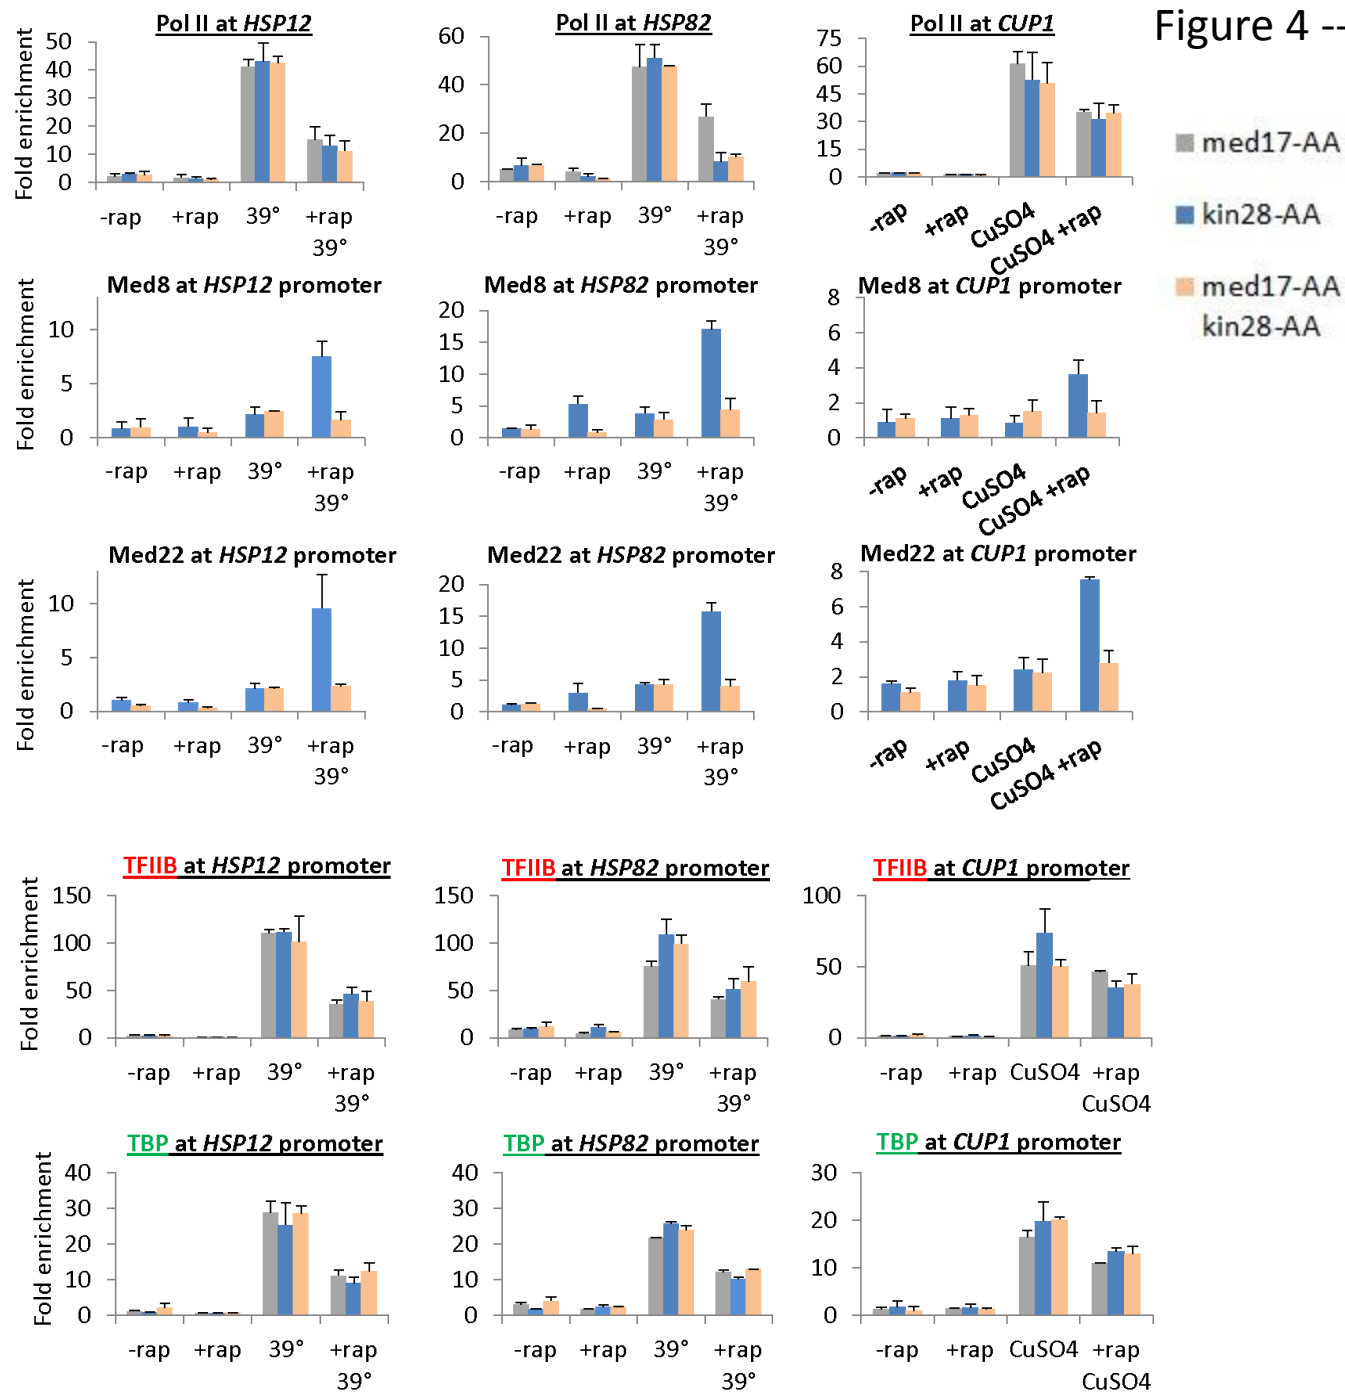

Figure 4 -- figure supplement 2

A

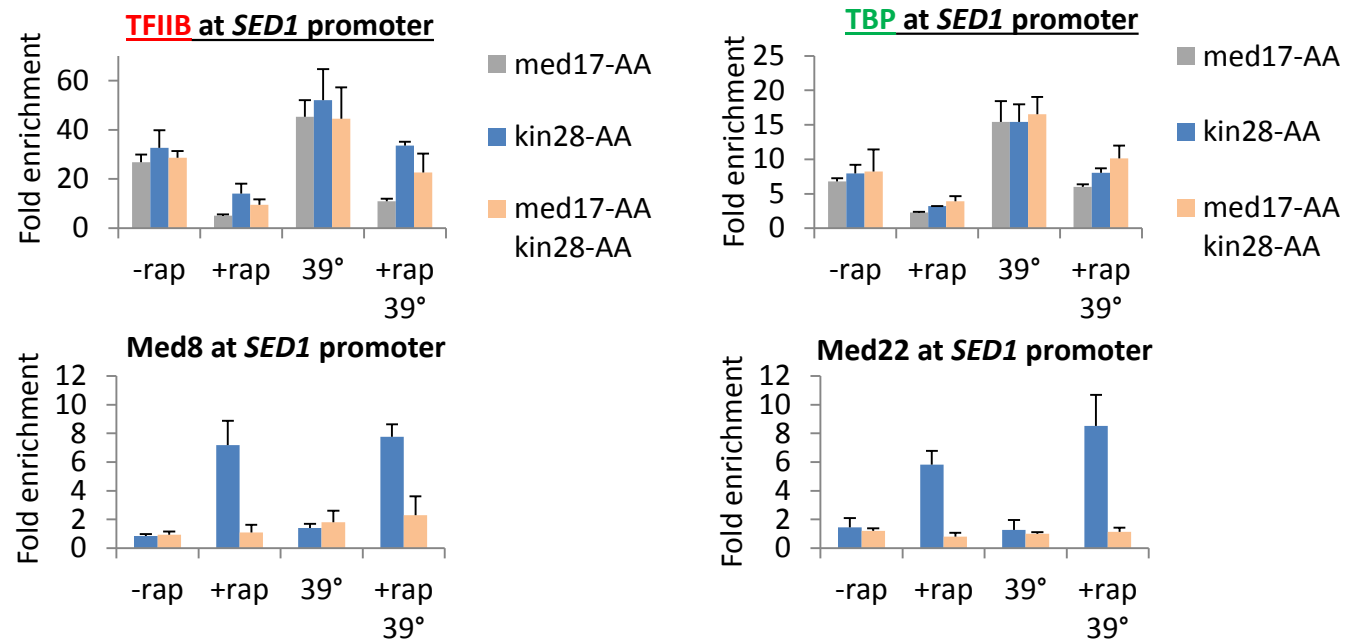

B

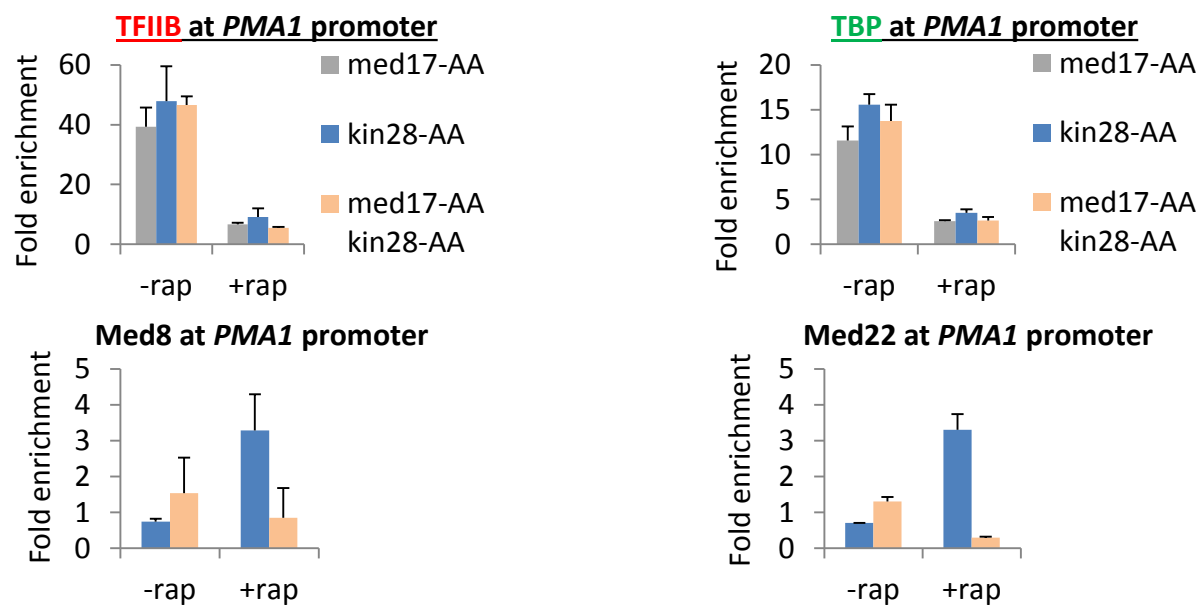

Figure 6 -- figure supplement 1

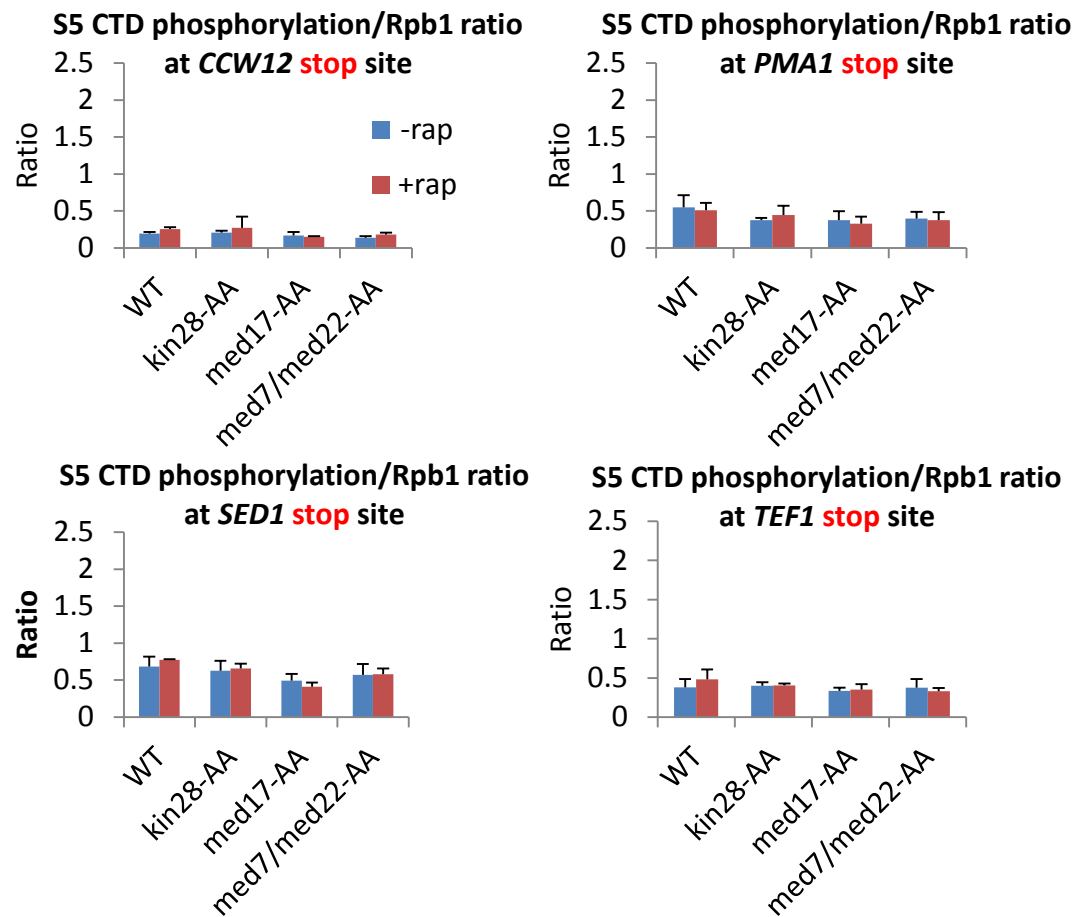

Supplement: supp [file elife_poa_e28447_Figure_3_figure_supplement_1.pdf › elife_poa_e28447_Figure_3_figure_supplement_1.pdf]
