# Supplementary material for: Evidence that Mediator is essential for Pol II transcription, but is not a required component of the preinitiation complex in vivo
Source: eLife journal article supplement (doi:10.7554/elife.28447), 2017-07-12
Supplement: supp [file elife_poa_e28447_Supplementary_File.xlsx]

## Sheet: Sheet1
Table S1. Strains used in this study, related to EXPERIMENTAL PROCEDURES
Strains used
Strain name	Genotype			Comment
HHY168	MATalpha, tor1-1, fpr1::NAT, RPL13A-2xFKB12::TRP1			Wildtype control strain; From Haruki et al., 2008.
KHW75	MATalpha, tor1-1, fpr1::NAT, RPL13A-2xFKB12::TRP1, RPB1-FRB::KANMX			Pol II (Rpb1) anchor-away strain
KHW76	MATalpha, tor1-1, fpr1::NAT, RPL13A-2xFKB12::TRP1, SPT15-FRB::KANMX			TBP (Spt15) anchor-away strain
KHW124	MATalpha, tor1-1, fpr1::NAT, RPL13A-2xFKB12::TRP1, TFA2-FRB::HIS3			TFIIE (Tfa2) anchor-away strain
KHW127	MATalpha, tor1-1, fpr1::NAT, RPL13A-2xFKB12::TRP1, KIN28-FRB::HIS3			Kin28 anchor-away strain
KHW128	MATalpha, tor1-1, fpr1::NAT, RPL13A-2xFKB12::TRP1, SSL2-FRB::HIS3			TFIIH (Ssl2) anchor-away strain
KHW129	MATalpha, tor1-1, fpr1::NAT, RPL13A-2xFKB12::TRP1, SUA7-FRB::HIS3			TFIIB (Sua7) anchor-away strain
KHW130	MATalpha, tor1-1, fpr1::NAT, RPL13A-2xFKB12::TRP1, TOA1-FRB::HIS3			TFIIA (Toa1) anchor-away strain
KHW134	MATalpha, tor1-1, fpr1::NAT, RPL13A-2xFKB12::TRP1, TFG1-FRB::HIS3			TFIIF (Tfg1) anchor-away strain
KHW256	MATalpha, tor1-1, fpr1::NAT, RPL13A-2xFKB12::TRP1, SRB10-FRB::HIS3			Srb10 anchor-away strain
KHW257	MATalpha, tor1-1, fpr1::NAT, RPL13A-2xFKB12::TRP1, SIN4-FRB::HIS3			Sin4 anchor-away strain
KHW258	MATalpha, tor1-1, fpr1::NAT, RPL13A-2xFKB12::TRP1, RGR1-FRB::HIS3			Rgr1 anchor-away strain
KHW328	MATalpha, tor1-1, fpr1::NAT, RPL13A-2xFKB12::TRP1, KIN28-FRB::HIS3, GAL11-13xMyc::HPHr			Kin28 anchor-away Gal11-13xMyc tagged strain
KHW329	MATalpha, tor1-1, fpr1::NAT, RPL13A-2xFKB12::TRP1, KIN28-FRB::HIS3, MED7-13xMyc::HPHr			Kin28 anchor-away Med7-13xMyc tagged strain
KHW330	MATalpha, tor1-1, fpr1::NAT, RPL13A-2xFKB12::TRP1, KIN28-FRB::HIS3, RGR1-13xMyc::HPHr			Kin28 anchor-away Rgr1-13xMyc tagged strain
KHW332	MATalpha, tor1-1, fpr1::NAT, RPL13A-2xFKB12::TRP1, KIN28-FRB::HIS3, SRB6-13xMyc::HPHr			Kin28 anchor-away Srb6-13xMyc tagged strain
KHW333	MATalpha, tor1-1, fpr1::NAT, RPL13A-2xFKB12::TRP1, KIN28-FRB::HIS3, SRB10-13xMyc::HPHr			Kin28 anchor-away Srb10-13xMyc tagged strain
YJ65	MATalpha, tor1-1, fpr1::NAT, RPL13A-2xFKB12::TRP1, SRB6-FRB::HIS3			Srb6 anchor-away strain
YJ66	MATalpha, tor1-1, fpr1::NAT, RPL13A-2xFKB12::TRP1, MED7-FRB::HIS3			Med7 anchor-away strain
YJ67	MATalpha, tor1-1, fpr1::NAT, RPL13A-2xFKB12::TRP1, MED7-FRB::HIS3 SRB6-FRB::KANMX			Srb6 Med7 double anchor-away strain
YJ68	MATalpha, tor1-1, fpr1::NAT, RPL13A-2xFKB12::TRP1, MED7-FRB::KANMX SRB6-FRB::HIS3			Srb6 Med7 double anchor-away strain
YJ78	MATalpha, tor1-1, fpr1::NAT, RPL13A-2xFKB12::TRP1, GAL11-FRB::KANMX			Gal11 anchor-away strain
YJ141	MATalpha, tor1-1, fpr1::NAT, RPL13A-2xFKB12::TRP1, KIN28-FRB::HIS3, MED8-13xMyc::HPHr			Kin28 anchor-away Med8-13xMyc tagged strain
YJ146	MATalpha, tor1-1, fpr1::NAT, RPL13A-2xFKB12::TRP1, KIN28-FRB::HIS3, SRB2-13xMyc::HPHr			Kin28 anchor-away Srb2-13xMyc tagged strain
YJ147	MATalpha, tor1-1, fpr1::NAT, RPL13A-2xFKB12::TRP1, KIN28-FRB::HIS3, SRB7-13xMyc::HPHr			Kin28 anchor-away Srb7-13xMyc tagged strain
YJ93	MATalpha, tor1-1, fpr1::NAT, RPL13A-2xFKB12::TRP1, MED1-FRB::KANMX6			Med1 anchor-away strain
YJ94	MATalpha, tor1-1, fpr1::NAT, RPL13A-2xFKB12::TRP1, MED2-FRB::KANMX6			Med2 anchor-away strain
YJ95	MATalpha, tor1-1, fpr1::NAT, RPL13A-2xFKB12::TRP1, PGD1-FRB::KANMX6			Pgd1 anchor-away strain
YJ96	MATalpha, tor1-1, fpr1::NAT, RPL13A-2xFKB12::TRP1, MED4-FRB::KANMX6			Med4 anchor-away strain
YJ97	MATalpha, tor1-1, fpr1::NAT, RPL13A-2xFKB12::TRP1, MED5-FRB::KANMX6			Med5 anchor-away strain
YJ98	MATalpha, tor1-1, fpr1::NAT, RPL13A-2xFKB12::TRP1, MED6-FRB::KANMX6			Med6 anchor-away strain
YJ99	MATalpha, tor1-1, fpr1::NAT, RPL13A-2xFKB12::TRP1, MED8-FRB::KANMX6			Med8 anchor-away strain
YJ100	MATalpha, tor1-1, fpr1::NAT, RPL13A-2xFKB12::TRP1, MED9-FRB::KANMX6			Med9 anchor-away strain
YJ101	MATalpha, tor1-1, fpr1::NAT, RPL13A-2xFKB12::TRP1, MED10-FRB::KANMX6			Med10 anchor-away strain
YJ102	MATalpha, tor1-1, fpr1::NAT, RPL13A-2xFKB12::TRP1, MED11-FRB::KANMX6			Med11 anchor-away strain
YJ103	MATalpha, tor1-1, fpr1::NAT, RPL13A-2xFKB12::TRP1, SRB5-FRB::KANMX6			Srb5 anchor-away strain
YJ104	MATalpha, tor1-1, fpr1::NAT, RPL13A-2xFKB12::TRP1, SRB4-FRB::KANMX6			Srb4 anchor-away strain. Kind gift from Francois Robert
YJ105	MATalpha, tor1-1, fpr1::NAT, RPL13A-2xFKB12::TRP1, SRB2-FRB::KANMX6			Srb2 anchor-away strain
YJ106	MATalpha, tor1-1, fpr1::NAT, RPL13A-2xFKB12::TRP1, SRB5-FRB::KANMX6			Srb5 anchor-away strain
YJ107	MATalpha, tor1-1, fpr1::NAT, RPL13A-2xFKB12::TRP1, MED31-FRB::KANMX6			Med31 anchor-away strain
NP69	KIN28-FRB-KANMX tor1-1 fpr1Δ RPL13A-2xFKBP12 GAL11-13xMYC-HPHr GAL11-6xHA-HIS3::ura3 various auxotrophies			GAL11-MYC GAL11-6HA KIN28-AA
NP72	KIN28-FRB-KANMX tor1-1 fpr1Δ RPL13A-2xFKBP12 RGR1-13xMYC-HPHr RGR1-6xHA-HIS3::ura3 various auxotrophies			RGR1-13MYC RGR1-6HA KIN28-AA
NP80	KIN28-FRB-KANMX tor1-1 fpr1Δ RPL13A-2xFKBP12 RGR1-13xMYC-HPHr GAL11-6xHA-HIS3::ura3 various auxotrophies			RGR1-13MYC GAL11-6HA KIN28-AA
NP78	Background HHY168 MATalpha, tor1-1, fpr1::NAT, RPL13A-2xFKB12::TRP1, KIN28-FRB:HIS3 SRB4-FRB::KANMX6			Srb4 Kin28 double anchor-away strain
NP86	Background HHY168 MATalpha, tor1-1, fpr1::NAT, RPL13A-2xFKB12::TRP1, SRB4-FRB::KANMX6 med3Δ::HIS3 gal11Δ::URA3			SRB4 anchor-away strain with med3Δ gal11Δ
Z579 (SRB4+)	MATa ura3-52 his3Δ200 leu2-3,112 srb4Δ2::HIS3 [pCT127 (SRB4 LEU2 CEN)]			Kuras, L. and Struhl, K. (1999) Nature 399:609-613 Gadbois, et al. (1997) PNAS 94:3145-3150 Thompson, C.M. and Young, R.A. (1995) PNAS 92:4587-4590
Z628 (srb4-138)	MATa ura3-52 his3Δ200 leu2-3,112 srb4Δ2::HIS3 [pCT181 (srb4-138 LEU2 CEN)]			Kuras, L. and Struhl, K. (1999) Nature 399:609-613 Gadbois, et al. (1997) PNAS 94:3145-3150 Thompson, C.M. and Young, R.A. (1995) PNAS 92:4587-4590
