# Supplementary material for: Evidence that Mediator is essential for Pol II transcription, but is not a required component of the preinitiation complex in vivo
Source: eLife. 2017 Jul 12;6:e28447. doi: 10.7554/eLife.28447 (PMC5529107; doi:10.7554/eLife.28447)
Supplement: Supplementary file 1. — DOI: http://dx.doi.org/10.7554/eLife.28447.018 [file elife-28447-supp1.xlsx]

## Sheet: Sheet1
Table S1. Strains used in this study, related to EXPERIMENTAL PROCEDURES
Strains used
Strain name	Genotype			Comment
HHY168	MATalpha, tor1-1, fpr1::NAT, RPL13A-2xFKB12::TRP1			Wildtype control strain; From Haruki et al., 2008.
KHW75	MATalpha, tor1-1, fpr1::NAT, RPL13A-2xFKB12::TRP1, RPB1-FRB::KANMX			Pol II (Rpb1) anchor-away strain
KHW76	MATalpha, tor1-1, fpr1::NAT, RPL13A-2xFKB12::TRP1, SPT15-FRB::KANMX			TBP (Spt15) anchor-away strain
KHW125	MATalpha, tor1-1, fpr1::NAT, RPL13A-2xFKB12::TRP1, TFA1-FRB::HIS3			TFA1 anchor away strain
KHW127	MATalpha, tor1-1, fpr1::NAT, RPL13A-2xFKB12::TRP1, KIN28-FRB::HIS3			Kin28 anchor-away strain
KHW124	MATalpha, tor1-1, fpr1::NAT, RPL13A-2xFKB12::TRP1, TFA2-FRB::HIS3			TFA2 anchor away strain
KHW130	MATalpha, tor1-1, fpr1::NAT, RPL13A-2xFKB12::TRP1, TOA1-FRB::HIS3			TFIIA (Toa1) anchor-away strain
KHW131	MATalpha, tor1-1, fpr1::NAT, RPL13A-2xFKB12::TRP1, TOA2-FRB::HIS3			TOA2 anchor away strain
KHW132	MATalpha, tor1-1, fpr1::NAT, RPL13A-2xFKB12::TRP1, TAF1-FRB::HIS3			TAF1 anchor-away strain
KHW134	MATalpha, tor1-1, fpr1::NAT, RPL13A-2xFKB12::TRP1, TFG1-FRB::HIS3			TFIIF (Tfg1) anchor-away strain
KHW256	MATalpha, tor1-1, fpr1::NAT, RPL13A-2xFKB12::TRP1, SRB10-FRB::HIS3			Srb10 anchor-away strain
KHW257	MATalpha, tor1-1, fpr1::NAT, RPL13A-2xFKB12::TRP1, SIN4-FRB::HIS3			Sin4 anchor-away strain
KHW258	MATalpha, tor1-1, fpr1::NAT, RPL13A-2xFKB12::TRP1, RGR1-FRB::HIS3			Rgr1 anchor-away strain
KHW332	MATalpha, tor1-1, fpr1::NAT, RPL13A-2xFKB12::TRP1, KIN28-FRB::HIS3, MED22-13xMyc::HPHr			Kin28 anchor-away Srb6-13xMyc tagged strain
YJ65	MATalpha, tor1-1, fpr1::NAT, RPL13A-2xFKB12::TRP1, SRB6-FRB::HIS3			Srb6 anchor-away strain
YJ66	MATalpha, tor1-1, fpr1::NAT, RPL13A-2xFKB12::TRP1, MED7-FRB::HIS3			Med7 anchor-away strain
YJ67	MATalpha, tor1-1, fpr1::NAT, RPL13A-2xFKB12::TRP1, MED7-FRB::HIS3 SRB6-FRB::KANMX			Srb6 Med7 double anchor-away strain
YJ68	MATalpha, tor1-1, fpr1::NAT, RPL13A-2xFKB12::TRP1, MED7-FRB::KANMX SRB6-FRB::HIS3			Srb6 Med7 double anchor-away strain
YJ78	MATalpha, tor1-1, fpr1::NAT, RPL13A-2xFKB12::TRP1, GAL11-FRB::KANMX			Gal11 anchor-away strain
YJ141	MATalpha, tor1-1, fpr1::NAT, RPL13A-2xFKB12::TRP1, KIN28-FRB::HIS3, MED8-13xMyc::HPHr			Kin28 anchor-away Med8-13xMyc tagged strain
YJ146	MATalpha, tor1-1, fpr1::NAT, RPL13A-2xFKB12::TRP1, KIN28-FRB::HIS3, SRB2-13xMyc::HPHr			Kin28 anchor-away Srb2-13xMyc tagged strain
YJ147	MATalpha, tor1-1, fpr1::NAT, RPL13A-2xFKB12::TRP1, KIN28-FRB::HIS3, SRB7-13xMyc::HPHr			Kin28 anchor-away Srb7-13xMyc tagged strain
YJ93	MATalpha, tor1-1, fpr1::NAT, RPL13A-2xFKB12::TRP1, MED1-FRB::KANMX6			Med1 anchor-away strain
YJ94	MATalpha, tor1-1, fpr1::NAT, RPL13A-2xFKB12::TRP1, MED2-FRB::KANMX6			Med2 anchor-away strain
YJ95	MATalpha, tor1-1, fpr1::NAT, RPL13A-2xFKB12::TRP1, PGD1-FRB::KANMX6			Pgd1 anchor-away strain
YJ96	MATalpha, tor1-1, fpr1::NAT, RPL13A-2xFKB12::TRP1, MED4-FRB::KANMX6			Med4 anchor-away strain
YJ97	MATalpha, tor1-1, fpr1::NAT, RPL13A-2xFKB12::TRP1, MED5-FRB::KANMX6			Med5 anchor-away strain
YJ98	MATalpha, tor1-1, fpr1::NAT, RPL13A-2xFKB12::TRP1, MED6-FRB::KANMX6			Med6 anchor-away strain
YJ99	MATalpha, tor1-1, fpr1::NAT, RPL13A-2xFKB12::TRP1, MED8-FRB::KANMX6			Med8 anchor-away strain
YJ100	MATalpha, tor1-1, fpr1::NAT, RPL13A-2xFKB12::TRP1, MED9-FRB::KANMX6			Med9 anchor-away strain
YJ101	MATalpha, tor1-1, fpr1::NAT, RPL13A-2xFKB12::TRP1, MED10-FRB::KANMX6			Med10 anchor-away strain
YJ102	MATalpha, tor1-1, fpr1::NAT, RPL13A-2xFKB12::TRP1, MED11-FRB::KANMX6			Med11 anchor-away strain
YJ103	MATalpha, tor1-1, fpr1::NAT, RPL13A-2xFKB12::TRP1, SRB5-FRB::KANMX6			Srb5 anchor-away strain
YJ104	MATalpha, tor1-1, fpr1::NAT, RPL13A-2xFKB12::TRP1, SRB4-FRB::KANMX6			Srb4 anchor-away strain. Kind gift from Francois Robert
YJ105	MATalpha, tor1-1, fpr1::NAT, RPL13A-2xFKB12::TRP1, SRB2-FRB::KANMX6			Srb2 anchor-away strain
YJ106	MATalpha, tor1-1, fpr1::NAT, RPL13A-2xFKB12::TRP1, SRB7-FRB::KANMX6			Srb7 anchor-away strain
YJ107	MATalpha, tor1-1, fpr1::NAT, RPL13A-2xFKB12::TRP1, MED31-FRB::KANMX6			Med31 anchor-away strain
NP78	Background HHY168 MATalpha, tor1-1, fpr1::NAT, RPL13A-2xFKB12::TRP1, KIN28-FRB:HIS3 SRB4-FRB::KANMX6			Srb4 and Kin28 double anchor-away strain
NP81	Background HHY168 MATalpha, tor1-1, fpr1::NAT, RPL13A-2xFKB12::TRP1, SRB5-FRB::HIS3 MED1-FRB::KANMX			Med1 and Srb5 double anchor-away
NP83	Background HHY168 MATalpha, tor1-1, fpr1::NAT, RPL13A-2xFKB12::TRP1, SRB5-FRB::HIS3 MED1-FRB::KAN med9Δ::URA3			med9Δ Med1 and Srb2 double anchor-away
NP86	Background HHY168 MATalpha, tor1-1, fpr1::NAT, RPL13A-2xFKB12::TRP1, SRB4-FRB::KANMX6 med3Δ::HIS3 gal11Δ::URA3			SRB4 anchor-away strain with med3Δ gal11Δ
NP123	Background HHY168 MATalpha, tor1-1, fpr1::NAT, RPL13A-2xFKB12::TRP1, KIN28-FRB:HIS3 SRB4-FRB::KANMX6 MED8-13xMYC::HPH			Srb4 and Kin28 double anchor away, Med8-13xmyc
NP124	Background HHY168 MATalpha, tor1-1, fpr1::NAT, RPL13A-2xFKB12::TRP1, KIN28-FRB:HIS3 SRB4-FRB::KANMX6 SRB6-13xMYC::HPH			Srb4 and Kin28 double anchor away, Srb6-13xmyc
NP126	Background HHY168 MATalpha, tor1-1, fpr1::NAT, RPL13A-2xFKB12::TRP1, SRB4-FRB::KANMX6 PGD1-FRB::URA3 GAL11-FRB::HIS3			Srb4, Med3, and Gal11 triple anchor away
NP127	Background HHY168 MATalpha, tor1-1, fpr1::NAT, RPL13A-2xFKB12::TRP1, TBP-FRB::KANMX6 KIN28-FRB::URA3 SRB6-13xMYC::HPHMX			TBP-AA KIN28-AA SRB6-MYC
Z579 (SRB4+)	MATa ura3-52 his3Δ200 leu2-3,112 srb4Δ2::HIS3 [pCT127 (SRB4 LEU2 CEN)]			Kuras, L. and Struhl, K. (1999) Nature 399:609-613 Gadbois, et al. (1997) PNAS 94:3145-3150 Thompson, C.M. and Young, R.A. (1995) PNAS 92:4587-4590
Z628 (srb4-138)	MATa ura3-52 his3Δ200 leu2-3,112 srb4Δ2::HIS3 [pCT181 (srb4-138 LEU2 CEN)]			Kuras, L. and Struhl, K. (1999) Nature 399:609-613 Gadbois, et al. (1997) PNAS 94:3145-3150 Thompson, C.M. and Young, R.A. (1995) PNAS 92:4587-4590
